# Supplementary material for: Cavefish eye loss in response to an early block in retinal differentiation progression
Source: Oxford University Press journal article supplement (doi:10.1242/dev.114629), 2015-01-01
Supplement: dev114629supp.pdf [file dev114629supp.pdf]

## Supplementary material

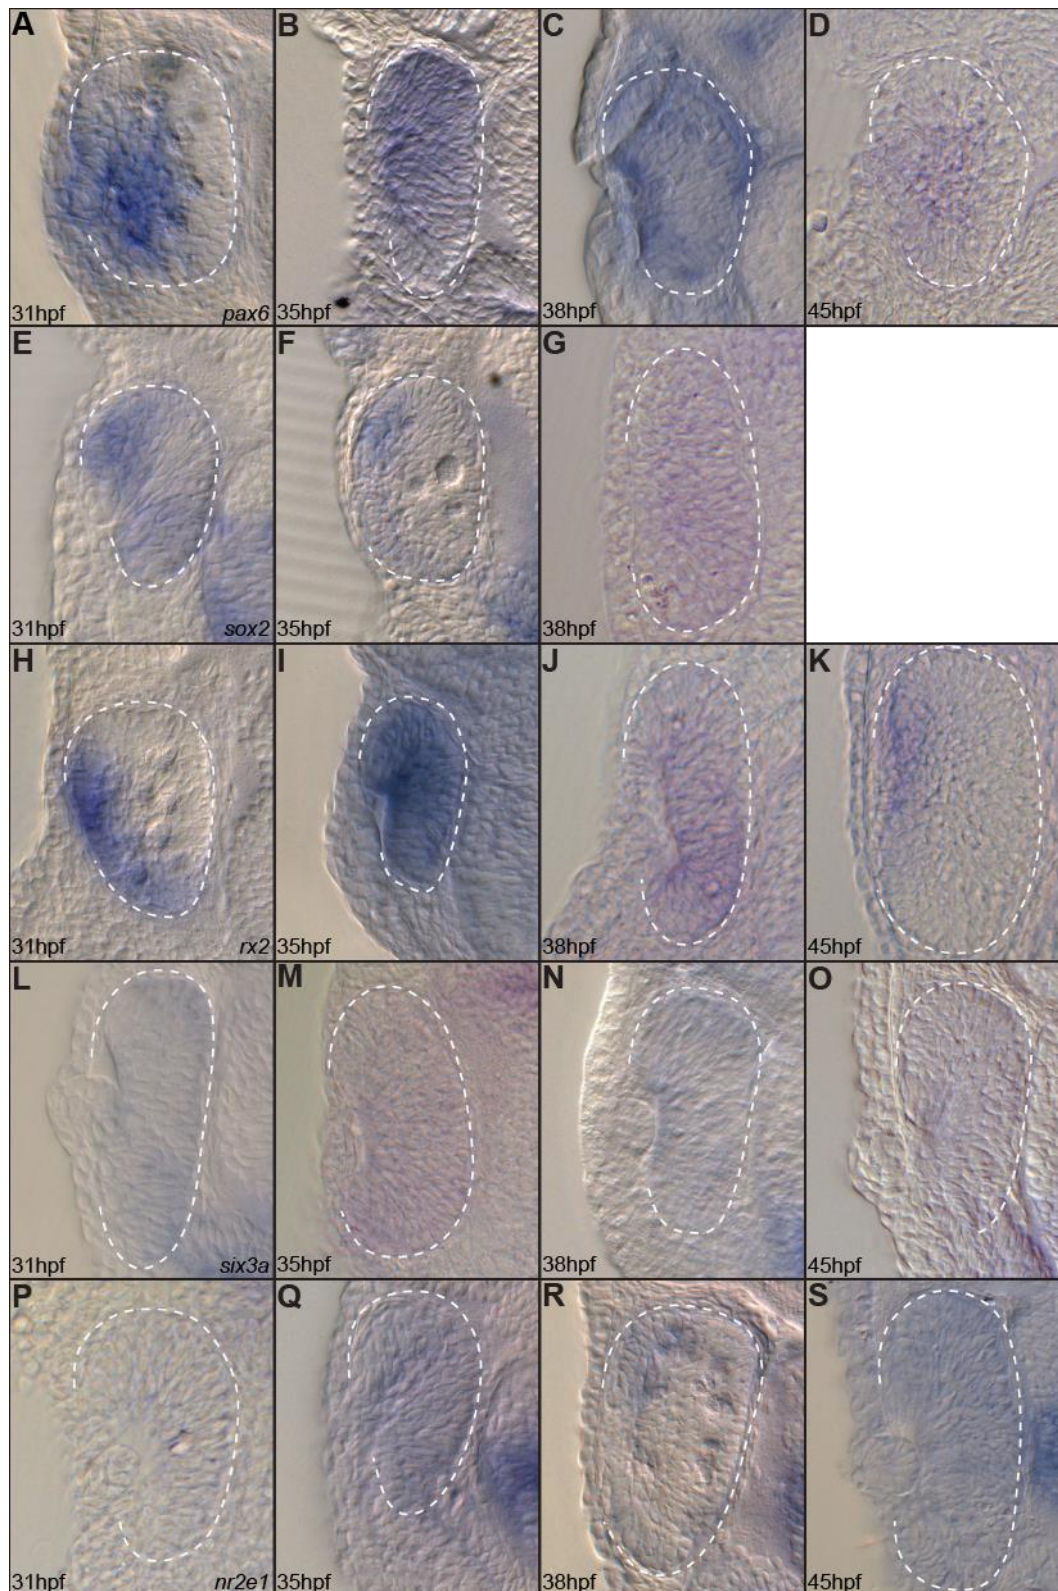

**Fig. S1. Expression of *pax6*, *sox2*, *rx2*, *six3a* and *nr2e1* in the retina of *Phreatichthys andruzzii* at stages of eye differentiation**

*Pax6* was expressed extensively throughout the retina from 31 hpf to 38 hpf (A-C) and diminished slightly at 45 hpf. *Sox2* expression peripheral to the lens at 31 hpf (E), only dorsally at 35 hpf (F) and overall weak at 38 hpf (G). *Rx2* was strongest at 31 hpf and 35 hpf (H,I) and became more defined to an area close to the lens until 45 hpf (J,K). Expression of *six3a* is uniformly weak at all time-points (L-O), but present as well as *nr2e1* (P-S), except 38 hpf, when staining was observed dorsally in the retina (R). Retinae are encircled by dashed lines.

**Table S1. PCR primer sequences**

Degenerate and conventional primers used to amplify a ca. 500bp fragment of the respective cDNA.

| <b>Gene</b>                                 | <b>Forward Primer 5' – 3'</b>        | <b>Reverse Primer 5' – 3'</b>        |
|---------------------------------------------|--------------------------------------|--------------------------------------|
| <i>ato7</i>                                 | CCAGAGACCCGGAGAAGTTTGA<br>GAGT       | CCAGTCTTTCTGAGGATCCACG<br>TGTC       |
| <i>barhl2</i>                               | CCAGCGGGTTCGAGTTTTGGRAT<br>AGACACTA  | GCCAGCGGTTTACTGTGCGCCCA<br>ARATGTC   |
| <i>crx</i>                                  | ATGATGTCCTACATAAAGCARC<br>CCCATTA    | GGCTGRCCRTAGCTCATGGGA<br>TA          |
| <i>isl1</i>                                 | ATCAGGTTRTACGGGATCAAAT<br>GT         | GTTGGGITGCTGCTGCTGGAGIT<br>GCTTCAT   |
| <i>nr2e1</i>                                | GACAAGACICACAGAAACCAGT               | GCCCACTTGATGCTCATGAA                 |
| <i>opsin (long-<br/>wave<br/>sensitive)</i> | GGAAACGTCAAGTTTGATGCCA<br>AAT        | GGGTTGTAGATGGTGGCGCTC<br>TTGGCAAAGTA |
| <i>pax6</i>                                 | CGCAACCTGGCTAGYGAAAAGC<br>AACA       | CTGCTGCTGATGGGTATGTGAC<br>T          |
| <i>pou4f2</i>                               | CACAGCCCCTTCAAGCCGGACG<br>C          | GCCACGCTTGCAGGATGGGCT<br>TCA         |
| <i>rhodopsin</i>                            | GTCTGCAAGCCCATSAGCAACTT              | CGGAACTGCTTGTTTCATGCAG<br>ATGTAGAT   |
| <i>rx2</i>                                  | ACCACCTTCACCACCTATCAGCT              | GACTGAATGTGCTCYTTGGCCT<br>TCAT       |
| <i>rx3</i>                                  | CAGGAGAAGCTGGARGTGAGCT<br>CCAT       | CTGAATGTGTTCCCTTGGCYTTC<br>ATCCT     |
| <i>shh</i>                                  | GGCTACGGCAGRAGAAGACAYC<br>CGAAGAA    | GCTTTGGACTCRTARTAGACCC<br>AGTC       |
| <i>six3a</i>                                | GAGACGCTGGAGGAGACCGGGG<br>ACAT       | GGGTTIGGGTAIGGGTCCTGIAG<br>GTA       |
| <i>sox2</i>                                 | ATGTATAACATGATGGAAACYG<br>ARCTGAAGCC | CCTGCATCATGCCGTAGCCICC<br>GTT        |
| <i>vsx1</i>                                 | CCAAAGGGTTCGCAATCACAGA<br>TCT        | AGCTCTGTCTTCATTGCCAGCA<br>T          |
| <i>fgf8</i>                                 | ACCATTTCAGTCCCCGCCTAA                | TCAAAGGGTCTGTGCTCTGC                 |
| <i>nkx2.1</i>                               | TTTTGAGCCCGATCGAGGAG                 | GCTGGCCAAATGTTCCCTCT                 |
| <i>pax2.1</i>                               | TGACGTGGTCAGGCAAAGAA                 | TCTTTTCACCGTTGGAGCGA                 |
